# Supplementary material for: Analysis of the lipid body proteome of the oleaginous alga Lobosphaera incisa
Source: Springer Nature journal article supplement (doi:10.1186/s12870-017-1042-2), 2017-06-06

# Phyre2

|               |                              |
|---------------|------------------------------|
| Email         | hsiegle@gwdg.de              |
| Description   | Undefined                    |
| Date          | Wed Nov 30 10:59:22 GMT 2016 |
| Unique Job ID | 6f8220dc5c148320             |

## Secondary structure and disorder prediction

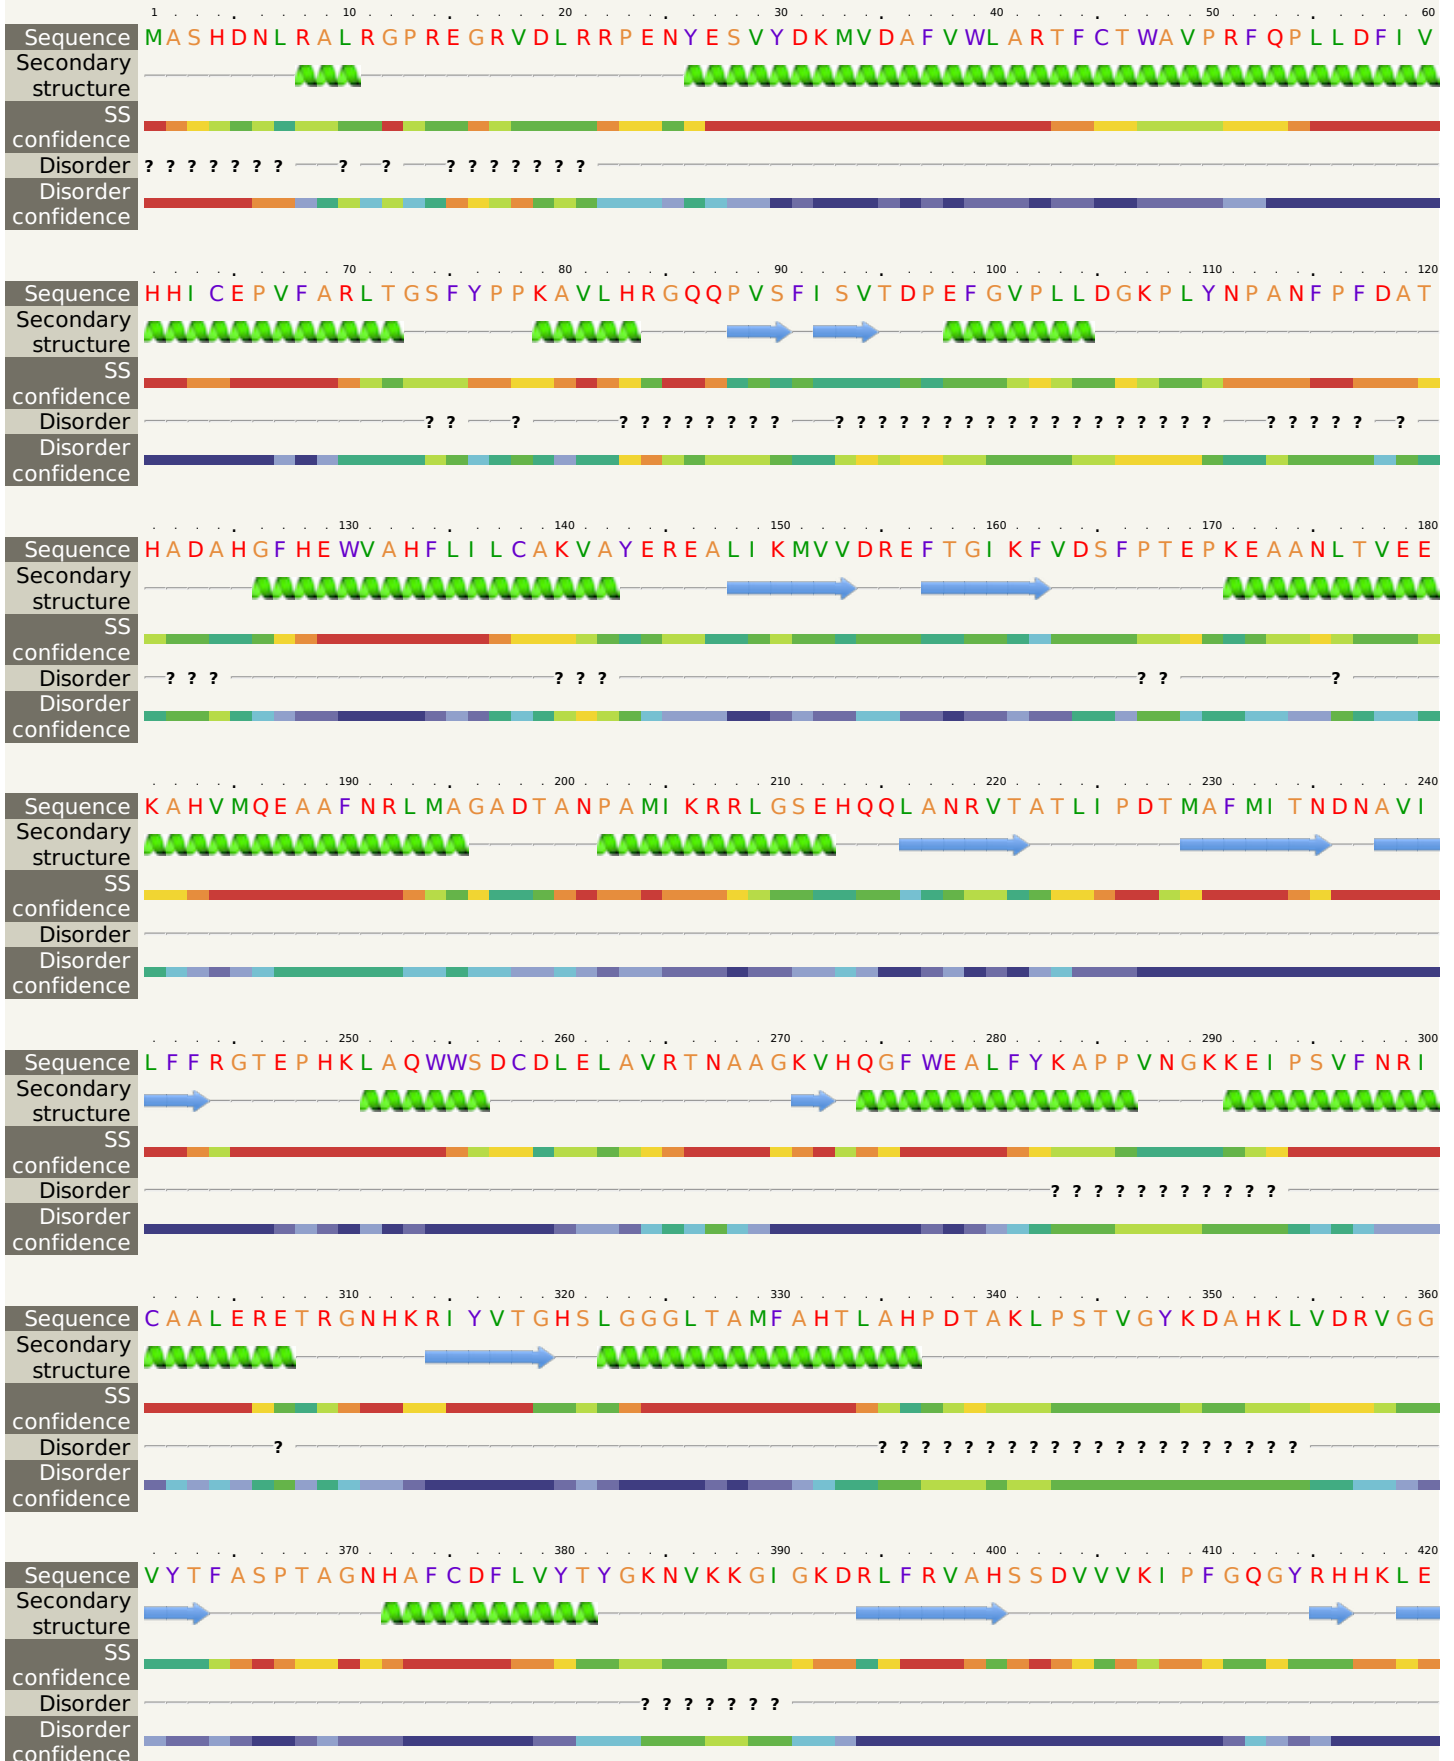

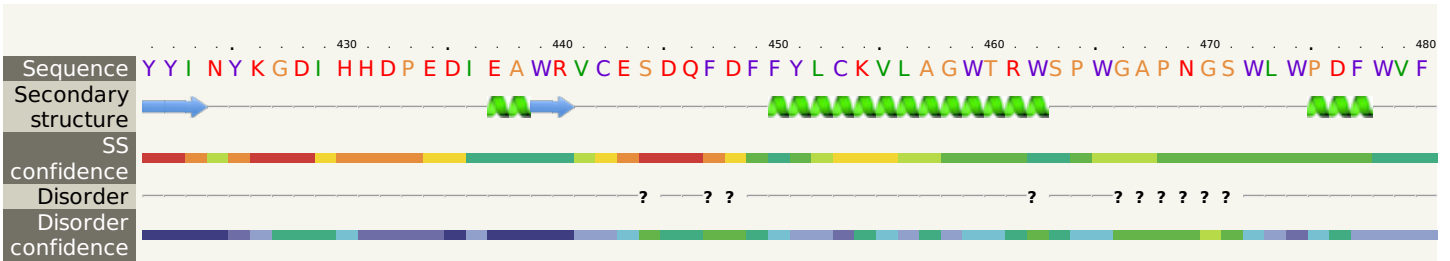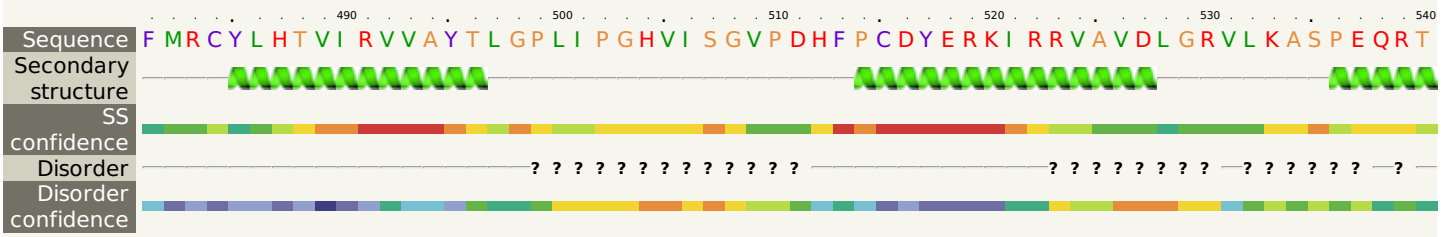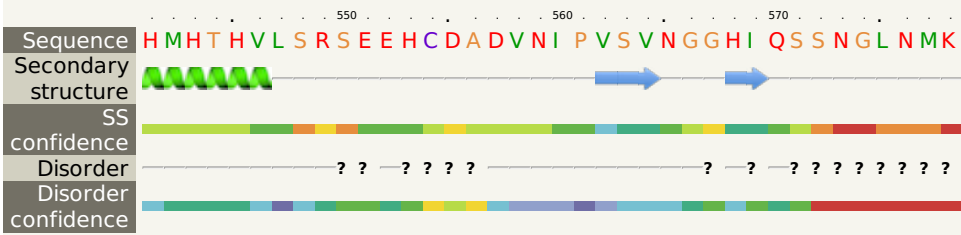

Confidence Key

High(9) Low (0)

? Disordered ( 26%)

Alpha helix ( 40%)

Beta strand ( 12%)

# Phyre2

|               |                              |
|---------------|------------------------------|
| Email         | hsiegle@gwdg.de              |
| Description   | Undefined                    |
| Date          | Wed Nov 30 10:59:22 GMT 2016 |
| Unique Job ID | 6f8220dc5c148320             |

Detailed template information

| #  | Template                | Alignment Coverage                                                                               | 3D Model                                                                            | Confidence | % i.d. | Template Information                                                                                                                                                                                                                                      |
|----|-------------------------|--------------------------------------------------------------------------------------------------|-------------------------------------------------------------------------------------|------------|--------|-----------------------------------------------------------------------------------------------------------------------------------------------------------------------------------------------------------------------------------------------------------|
| 1  | <a href="#">c3o0dF_</a> | 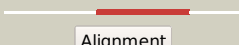<br>Alignment   |    | 100.0      | 29     | <b>PDB header:</b> hydrolase<br><b>Chain:</b> F: <b>PDB Molecule:</b> triacylglycerol lipase;<br><b>PDBTitle:</b> crystal structure of lip2 lipase from yarrowia lipolytica at 1.7 a2 resolution                                                          |
| 2  | <a href="#">c3uueA_</a> | <br>Alignment   |    | 100.0      | 25     | <b>PDB header:</b> hydrolase<br><b>Chain:</b> A: <b>PDB Molecule:</b> lip1, secretory lipase (family 3);<br><b>PDBTitle:</b> crystal structure of mono- and diacylglycerol lipase from malassezia2 globosa                                                |
| 3  | <a href="#">c3ngmB_</a> | <br>Alignment   |    | 100.0      | 29     | <b>PDB header:</b> hydrolase<br><b>Chain:</b> B: <b>PDB Molecule:</b> extracellular lipase;<br><b>PDBTitle:</b> crystal structure of lipase from gibberella zeae                                                                                          |
| 4  | <a href="#">d1uwca_</a> | <br>Alignment   |    | 100.0      | 29     | <b>Fold:</b> alpha/beta-Hydrolases<br><b>Superfamily:</b> alpha/beta-Hydrolases<br><b>Family:</b> Fungal lipases                                                                                                                                          |
| 5  | <a href="#">d1tiaa_</a> | <br>Alignment |  | 100.0      | 30     | <b>Fold:</b> alpha/beta-Hydrolases<br><b>Superfamily:</b> alpha/beta-Hydrolases<br><b>Family:</b> Fungal lipases                                                                                                                                          |
| 6  | <a href="#">c3g7nA_</a> | <br>Alignment |  | 100.0      | 25     | <b>PDB header:</b> hydrolase<br><b>Chain:</b> A: <b>PDB Molecule:</b> lipase;<br><b>PDBTitle:</b> crystal structure of a triacylglycerol lipase from penicillium2 expansum at 1.3                                                                         |
| 7  | <a href="#">d1tiba_</a> | <br>Alignment |  | 100.0      | 25     | <b>Fold:</b> alpha/beta-Hydrolases<br><b>Superfamily:</b> alpha/beta-Hydrolases<br><b>Family:</b> Fungal lipases                                                                                                                                          |
| 8  | <a href="#">d3tgla_</a> | <br>Alignment |  | 100.0      | 30     | <b>Fold:</b> alpha/beta-Hydrolases<br><b>Superfamily:</b> alpha/beta-Hydrolases<br><b>Family:</b> Fungal lipases                                                                                                                                          |
| 9  | <a href="#">d1lgva_</a> | <br>Alignment |  | 100.0      | 27     | <b>Fold:</b> alpha/beta-Hydrolases<br><b>Superfamily:</b> alpha/beta-Hydrolases<br><b>Family:</b> Fungal lipases                                                                                                                                          |
| 10 | <a href="#">c2yija_</a> | <br>Alignment |  | 100.0      | 20     | <b>PDB header:</b> hydrolase<br><b>Chain:</b> A: <b>PDB Molecule:</b> phospholipase a1-iigamma;<br><b>PDBTitle:</b> crystal structure of phospholipase a1                                                                                                 |
| 11 | <a href="#">c4nfuB_</a> | <br>Alignment |  | 100.0      | 16     | <b>PDB header:</b> signaling protein<br><b>Chain:</b> B: <b>PDB Molecule:</b> senescence-associated carboxylesterase 101;<br><b>PDBTitle:</b> structure of the central plant immunity signaling node eds1 in complex2 with its interaction partner sag101 |

|    |                          |           |                                                                                     |       |    |                                                                                                                                                                                                                                           |
|----|--------------------------|-----------|-------------------------------------------------------------------------------------|-------|----|-------------------------------------------------------------------------------------------------------------------------------------------------------------------------------------------------------------------------------------------|
| 12 | <a href="#">c4nfuA_</a>  | Alignment |    | 100.0 | 22 | <b>PDB header:</b> signaling protein<br><b>Chain:</b> A; <b>PDB Molecule:</b> eds1;<br><b>PDBTitle:</b> structure of the central plant immunity signaling node eds1 in complex2 with its interaction partner sag101                       |
| 13 | <a href="#">c2oryA_</a>  | Alignment |    | 100.0 | 25 | <b>PDB header:</b> hydrolase<br><b>Chain:</b> A; <b>PDB Molecule:</b> lipase;<br><b>PDBTitle:</b> crystal structure of m37 lipase                                                                                                         |
| 14 | <a href="#">c4x96B_</a>  | Alignment |    | 96.7  | 17 | <b>PDB header:</b> transferase<br><b>Chain:</b> B; <b>PDB Molecule:</b> phosphatidylcholine-sterol acyltransferase;<br><b>PDBTitle:</b> low resolution crystal structure of lecithin:cholesterol2 acyltransferase (lcat; residues 21-397) |
| 15 | <a href="#">c4x91C_</a>  | Alignment |    | 96.5  | 16 | <b>PDB header:</b> transferase<br><b>Chain:</b> C; <b>PDB Molecule:</b> group xv phospholipase a2;<br><b>PDBTitle:</b> crystal structure of lysosomal phospholipase a2 in complex with2 isopropyl dodec-11-enylfluorophosphonate (idfp)   |
| 16 | <a href="#">c4psdA_</a>  | Alignment |    | 95.9  | 23 | <b>PDB header:</b> hydrolase<br><b>Chain:</b> A; <b>PDB Molecule:</b> carbohydrate esterase family 5;<br><b>PDBTitle:</b> structure of trichoderma reesei cutinase native form.                                                           |
| 17 | <a href="#">c4z8zA_</a>  | Alignment |   | 95.7  | 17 | <b>PDB header:</b> unknown function<br><b>Chain:</b> A; <b>PDB Molecule:</b> uncharacterized protein;<br><b>PDBTitle:</b> crystal structure of the hypothetical protein from ruminiclostridium2 thermocellum atcc 27405                   |
| 18 | <a href="#">c3lp5A_</a>  | Alignment |  | 95.6  | 28 | <b>PDB header:</b> hydrolase<br><b>Chain:</b> A; <b>PDB Molecule:</b> putative cell surface hydrolase;<br><b>PDBTitle:</b> the crystal structure of the putative cell surface hydrolase from2 lactobacillus plantarum wcs1                |
| 19 | <a href="#">c2zyiB_</a>  | Alignment |  | 95.5  | 13 | <b>PDB header:</b> hydrolase<br><b>Chain:</b> B; <b>PDB Molecule:</b> lipase, putative;<br><b>PDBTitle:</b> a. fulgidus lipase with fatty acid fragment and calcium                                                                       |
| 20 | <a href="#">d1cexa_</a>  | Alignment |  | 95.3  | 19 | <b>Fold:</b> alpha/beta-Hydrolases<br><b>Superfamily:</b> alpha/beta-Hydrolases<br><b>Family:</b> Cutinase-like                                                                                                                           |
| 21 | <a href="#">c4r1dA_</a>  | Alignment | not modelled                                                                        | 94.9  | 22 | <b>PDB header:</b> hydrolase/hydrolase inhibitor<br><b>Chain:</b> A; <b>PDB Molecule:</b> uncharacterized protein;<br><b>PDBTitle:</b> the crystal structure of tle4-tli4 complex                                                         |
| 22 | <a href="#">c5f2hA_</a>  | Alignment | not modelled                                                                        | 94.9  | 10 | <b>PDB header:</b> unknown function<br><b>Chain:</b> A; <b>PDB Molecule:</b> uncharacterized protein;<br><b>PDBTitle:</b> 2.75 angstrom resolution crystal structure of uncharacterized protein2 from bacillus cereus atcc 10987          |
| 23 | <a href="#">c3ds8A_</a>  | Alignment | not modelled                                                                        | 94.9  | 19 | <b>PDB header:</b> structural genomics, unknown function<br><b>Chain:</b> A; <b>PDB Molecule:</b> lin2722 protein;<br><b>PDBTitle:</b> the crysatl structure of the gene lin2722 products from listeria2 innocua                          |
| 24 | <a href="#">d1luxoa_</a> | Alignment | not modelled                                                                        | 94.8  | 22 | <b>Fold:</b> alpha/beta-Hydrolases<br><b>Superfamily:</b> alpha/beta-Hydrolases<br><b>Family:</b> YdeN-like                                                                                                                               |
| 25 | <a href="#">d1cvla_</a>  | Alignment | not modelled                                                                        | 94.5  | 31 | <b>Fold:</b> alpha/beta-Hydrolases<br><b>Superfamily:</b> alpha/beta-Hydrolases<br><b>Family:</b> Bacterial lipase                                                                                                                        |
| 26 | <a href="#">d1ex9a_</a>  | Alignment | not modelled                                                                        | 94.4  | 24 | <b>Fold:</b> alpha/beta-Hydrolases<br><b>Superfamily:</b> alpha/beta-Hydrolases<br><b>Family:</b> Bacterial lipase                                                                                                                        |
| 27 | <a href="#">c4qnnC_</a>  | Alignment | not modelled                                                                        | 94.3  | 17 | <b>PDB header:</b> hydrolase<br><b>Chain:</b> C; <b>PDB Molecule:</b> phospholipase a 1 from hornet(vespa basalis) venom;<br><b>PDBTitle:</b> crystal structure of phospholipase a 1 from hornet(vespa basalis)2 venom                    |
| 28 | <a href="#">d1ispa_</a>  | Alignment | not modelled                                                                        | 94.3  | 19 | <b>Fold:</b> alpha/beta-Hydrolases<br><b>Superfamily:</b> alpha/beta-Hydrolases<br><b>Family:</b> Bacterial lipase<br><b>PDB header:</b> hydrolase                                                                                        |

|    |                         |           |              |      |    |                                                                                                                                                                                                                                                                                                              |
|----|-------------------------|-----------|--------------|------|----|--------------------------------------------------------------------------------------------------------------------------------------------------------------------------------------------------------------------------------------------------------------------------------------------------------------|
| 29 | <a href="#">c3d0kA_</a> | Alignment | not modelled | 94.2 | 21 | <b>Chain:</b> A: <b>PDB Molecule:</b> putative poly(3-hydroxybutyrate) depolymerase lpqc;<br><b>PDBTitle:</b> crystal structure of the lpqc, poly(3-hydroxybutyrate) depolymerase2 from bordetella parapertussis                                                                                             |
| 30 | <a href="#">d1tcaa_</a> | Alignment | not modelled | 94.2 | 21 | <b>Fold:</b> alpha/beta-Hydrolases<br><b>Superfamily:</b> alpha/beta-Hydrolases<br><b>Family:</b> Fungal lipases                                                                                                                                                                                             |
| 31 | <a href="#">c2h7xA_</a> | Alignment | not modelled | 94.0 | 23 | <b>PDB header:</b> hydrolase<br><b>Chain:</b> A: <b>PDB Molecule:</b> type i polyketide synthase pikaiv;<br><b>PDBTitle:</b> pikromycin thioesterase adduct with reduced triketide2 affinity label                                                                                                           |
| 32 | <a href="#">d1sfra_</a> | Alignment | not modelled | 94.0 | 13 | <b>Fold:</b> alpha/beta-Hydrolases<br><b>Superfamily:</b> alpha/beta-Hydrolases<br><b>Family:</b> Mycobacterial antigens                                                                                                                                                                                     |
| 33 | <a href="#">c4gw3A_</a> | Alignment | not modelled | 93.9 | 25 | <b>PDB header:</b> hydrolase<br><b>Chain:</b> A: <b>PDB Molecule:</b> putative lipase;<br><b>PDBTitle:</b> crystal structure of the lipase from proteus mirabilis                                                                                                                                            |
| 34 | <a href="#">d2h1ia1</a> | Alignment | not modelled | 93.8 | 17 | <b>Fold:</b> alpha/beta-Hydrolases<br><b>Superfamily:</b> alpha/beta-Hydrolases<br><b>Family:</b> Carboxylesterase/thioesterase 1                                                                                                                                                                            |
| 35 | <a href="#">c3fleB_</a> | Alignment | not modelled | 93.8 | 17 | <b>PDB header:</b> structural genomics, unknown function<br><b>Chain:</b> B: <b>PDB Molecule:</b> se_1780 protein;<br><b>PDBTitle:</b> se_1780 protein of unknown function from staphylococcus epidermidis.                                                                                                  |
| 36 | <a href="#">d2jba1</a>  | Alignment | not modelled | 93.8 | 17 | <b>Fold:</b> alpha/beta-Hydrolases<br><b>Superfamily:</b> alpha/beta-Hydrolases<br><b>Family:</b> 2,6-dihydropseudooxynicotine hydrolase-like                                                                                                                                                                |
| 37 | <a href="#">d2h7xa1</a> | Alignment | not modelled | 93.8 | 23 | <b>Fold:</b> alpha/beta-Hydrolases<br><b>Superfamily:</b> alpha/beta-Hydrolases<br><b>Family:</b> Thioesterase domain of polypeptide, polyketide and fatty acid synthases                                                                                                                                    |
| 38 | <a href="#">c2h1iA_</a> | Alignment | not modelled | 93.7 | 18 | <b>PDB header:</b> hydrolase<br><b>Chain:</b> A: <b>PDB Molecule:</b> carboxylesterase;<br><b>PDBTitle:</b> crystal structure of the bacillus cereus carboxylesterase                                                                                                                                        |
| 39 | <a href="#">c1pjaA_</a> | Alignment | not modelled | 93.7 | 11 | <b>PDB header:</b> hydrolase<br><b>Chain:</b> A: <b>PDB Molecule:</b> palmitoyl-protein thioesterase 2 precursor;<br><b>PDBTitle:</b> the crystal structure of palmitoyl protein thioesterase-2 reveals the2 basis for divergent substrate specificities of the two lysosomal3 thioesterases (ppt1 and ppt2) |
| 40 | <a href="#">d1pjaa_</a> | Alignment | not modelled | 93.7 | 11 | <b>Fold:</b> alpha/beta-Hydrolases<br><b>Superfamily:</b> alpha/beta-Hydrolases<br><b>Family:</b> Thioesterases                                                                                                                                                                                              |
| 41 | <a href="#">c2y6vB_</a> | Alignment | not modelled | 93.6 | 10 | <b>PDB header:</b> hydrolase<br><b>Chain:</b> B: <b>PDB Molecule:</b> peroxisomal membrane protein lpx1;<br><b>PDBTitle:</b> peroxisomal alpha-beta-hydrolase lpx1 (yor084w) from2 saccharomyces cerevisiae (crystal form i)                                                                                 |
| 42 | <a href="#">d1ei9a_</a> | Alignment | not modelled | 93.6 | 19 | <b>Fold:</b> alpha/beta-Hydrolases<br><b>Superfamily:</b> alpha/beta-Hydrolases<br><b>Family:</b> Thioesterases                                                                                                                                                                                              |
| 43 | <a href="#">c2rauA_</a> | Alignment | not modelled | 93.5 | 18 | <b>PDB header:</b> hydrolase<br><b>Chain:</b> A: <b>PDB Molecule:</b> putative esterase;<br><b>PDBTitle:</b> crystal structure of a putative lipase (np_343859.1) from sulfolobus2 solfataricus at 1.85 a resolution                                                                                         |
| 44 | <a href="#">c3lcrA_</a> | Alignment | not modelled | 93.5 | 20 | <b>PDB header:</b> hydrolase<br><b>Chain:</b> A: <b>PDB Molecule:</b> tautomycetin biosynthetic pks;<br><b>PDBTitle:</b> thioesterase from tautomycetin biosynthetic pathway                                                                                                                                 |
| 45 | <a href="#">c1qgeD_</a> | Alignment | not modelled | 93.4 | 22 | <b>PDB header:</b> hydrolase<br><b>Chain:</b> D: <b>PDB Molecule:</b> protein (triacylglycerol hydrolase);<br><b>PDBTitle:</b> new crystal form of pseudomonas glumae (formerly chromobacterium2 viscosum atcc 6918) lipase                                                                                  |
| 46 | <a href="#">d1r88a_</a> | Alignment | not modelled | 93.0 | 8  | <b>Fold:</b> alpha/beta-Hydrolases<br><b>Superfamily:</b> alpha/beta-Hydrolases<br><b>Family:</b> Mycobacterial antigens                                                                                                                                                                                     |
| 47 | <a href="#">c3mveB_</a> | Alignment | not modelled | 93.0 | 11 | <b>PDB header:</b> lyase<br><b>Chain:</b> B: <b>PDB Molecule:</b> upf0255 protein vv1_0328;<br><b>PDBTitle:</b> crystal structure of a novel pyruvate decarboxylase                                                                                                                                          |
| 48 | <a href="#">c1mo2A_</a> | Alignment | not modelled | 93.0 | 25 | <b>PDB header:</b> transferase<br><b>Chain:</b> A: <b>PDB Molecule:</b> erythronolide synthase, modules 5 and 6;<br><b>PDBTitle:</b> thioesterase domain from 6-deoxyerythronolide synthase2 (debs te), ph 8.5                                                                                               |
| 49 | <a href="#">d1mo2a_</a> | Alignment | not modelled | 93.0 | 25 | <b>Fold:</b> alpha/beta-Hydrolases<br><b>Superfamily:</b> alpha/beta-Hydrolases<br><b>Family:</b> Thioesterase domain of polypeptide, polyketide and fatty acid synthases                                                                                                                                    |
| 50 | <a href="#">c2jbaB_</a> | Alignment | not modelled | 92.9 | 23 | <b>PDB header:</b> hydrolase<br><b>Chain:</b> B: <b>PDB Molecule:</b> 2,6-dihydroxy-pseudo-oxynicotine hydrolase;<br><b>PDBTitle:</b> crystal structure of the 2,6-dihydroxy-pseudo-oxynicotine2 hydrolase.                                                                                                  |
| 51 | <a href="#">c4fleA_</a> | Alignment | not modelled | 92.7 | 15 | <b>PDB header:</b> hydrolase<br><b>Chain:</b> A: <b>PDB Molecule:</b> esterase;<br><b>PDBTitle:</b> crystal structure of the esterase yqia (ye3661) from yersinia2 enterocolitica, northeast structural genomics consortium target yer85                                                                     |
| 52 | <a href="#">c3bdvB_</a> | Alignment | not modelled | 92.7 | 22 | <b>PDB header:</b> hydrolase<br><b>Chain:</b> B: <b>PDB Molecule:</b> uncharacterized protein duf1234;<br><b>PDBTitle:</b> crystal structure of a putative yden-like hydrolase (eca3091) from2 pectobacterium atrosepticum scri1043 at 1.66 a resolution                                                     |
| 53 | <a href="#">d3b5ea1</a> | Alignment | not modelled | 92.6 | 16 | <b>Fold:</b> alpha/beta-Hydrolases<br><b>Superfamily:</b> alpha/beta-Hydrolases<br><b>Family:</b> Carboxylesterase/thioesterase 1                                                                                                                                                                            |
| 54 | <a href="#">d1k8qa_</a> | Alignment | not modelled | 92.5 | 22 | <b>Fold:</b> alpha/beta-Hydrolases<br><b>Superfamily:</b> alpha/beta-Hydrolases                                                                                                                                                                                                                              |

|    |                          |           |              |      |    |                                                                                                                                                                                                                                                                         |
|----|--------------------------|-----------|--------------|------|----|-------------------------------------------------------------------------------------------------------------------------------------------------------------------------------------------------------------------------------------------------------------------------|
|    |                          |           |              |      |    | <b>Family:</b> Gastric lipase                                                                                                                                                                                                                                           |
| 55 | <a href="#">d1xkta_</a>  | Alignment | not modelled | 92.5 | 13 | <b>Fold:</b> alpha/beta-Hydrolases<br><b>Superfamily:</b> alpha/beta-Hydrolases<br><b>Family:</b> Thioesterase domain of polypeptide, polyketide and fatty acid synthases                                                                                               |
| 56 | <a href="#">d4lipd_</a>  | Alignment | not modelled | 92.4 | 30 | <b>Fold:</b> alpha/beta-Hydrolases<br><b>Superfamily:</b> alpha/beta-Hydrolases<br><b>Family:</b> Bacterial lipase                                                                                                                                                      |
| 57 | <a href="#">c3picB_</a>  | Alignment | not modelled | 92.4 | 31 | <b>PDB header:</b> hydrolase<br><b>Chain:</b> B: <b>PDB Molecule:</b> cip2;<br><b>PDBTitle:</b> glucuronoyl esterase catalytic domain (cip2_ge) from hypocrea jecorina                                                                                                  |
| 58 | <a href="#">c2qrUA_</a>  | Alignment | not modelled | 92.4 | 18 | <b>PDB header:</b> structural genomics, unknown function<br><b>Chain:</b> A: <b>PDB Molecule:</b> uncharacterized protein;<br><b>PDBTitle:</b> crystal structure of an alpha/beta hydrolase superfamily protein from2 enterococcus faecalis                             |
| 59 | <a href="#">d1lppb2_</a> | Alignment | not modelled | 92.3 | 18 | <b>Fold:</b> alpha/beta-Hydrolases<br><b>Superfamily:</b> alpha/beta-Hydrolases<br><b>Family:</b> Pancreatic lipase, N-terminal domain                                                                                                                                  |
| 60 | <a href="#">c3l80A_</a>  | Alignment | not modelled | 92.2 | 13 | <b>PDB header:</b> hydrolase<br><b>Chain:</b> A: <b>PDB Molecule:</b> putative uncharacterized protein smu.1393c;<br><b>PDBTitle:</b> crystal structure of smu.1393c from streptococcus mutans ua159                                                                    |
| 61 | <a href="#">d1hlga_</a>  | Alignment | not modelled | 92.0 | 24 | <b>Fold:</b> alpha/beta-Hydrolases<br><b>Superfamily:</b> alpha/beta-Hydrolases<br><b>Family:</b> Gastric lipase                                                                                                                                                        |
| 62 | <a href="#">d1bu8a2_</a> | Alignment | not modelled | 91.8 | 21 | <b>Fold:</b> alpha/beta-Hydrolases<br><b>Superfamily:</b> alpha/beta-Hydrolases<br><b>Family:</b> Pancreatic lipase, N-terminal domain                                                                                                                                  |
| 63 | <a href="#">c2vavL_</a>  | Alignment | not modelled | 91.7 | 20 | <b>PDB header:</b> transferase<br><b>Chain:</b> L: <b>PDB Molecule:</b> acetyl-coa--deacetylcephalosporin c<br><b>PDBTitle:</b> crystal structure of deacetylcephalosporin c2 acetyltransferase (dac-soak)                                                              |
| 64 | <a href="#">c2veoA_</a>  | Alignment | not modelled | 91.6 | 19 | <b>PDB header:</b> hydrolase<br><b>Chain:</b> A: <b>PDB Molecule:</b> lipase a;<br><b>PDBTitle:</b> x-ray structure of candida antarctica lipase a in its closed state.                                                                                                 |
| 65 | <a href="#">c4h0cA_</a>  | Alignment | not modelled | 91.6 | 11 | <b>PDB header:</b> hydrolase<br><b>Chain:</b> A: <b>PDB Molecule:</b> phospholipase/carboxylesterase;<br><b>PDBTitle:</b> crystal structure of phospholipase/carboxylesterase from dyadobacter2 fermentans dsm 18053                                                    |
| 66 | <a href="#">c3h2iA_</a>  | Alignment | not modelled | 91.5 | 15 | <b>PDB header:</b> hydrolase<br><b>Chain:</b> A: <b>PDB Molecule:</b> esterase;<br><b>PDBTitle:</b> crystal structure of n228w mutant of the rice cell wall2 degrading esterase lipa from xanthomonas oryzae                                                            |
| 67 | <a href="#">c3wlaA_</a>  | Alignment | not modelled | 91.5 | 13 | <b>PDB header:</b> hydrolase<br><b>Chain:</b> A: <b>PDB Molecule:</b> oxidized polyvinyl alcohol hydrolase;<br><b>PDBTitle:</b> crystal structure of soph native                                                                                                        |
| 68 | <a href="#">d1f0na_</a>  | Alignment | not modelled | 91.4 | 13 | <b>Fold:</b> alpha/beta-Hydrolases<br><b>Superfamily:</b> alpha/beta-Hydrolases<br><b>Family:</b> Mycobacterial antigens                                                                                                                                                |
| 69 | <a href="#">c3i28A_</a>  | Alignment | not modelled | 91.4 | 25 | <b>PDB header:</b> hydrolase<br><b>Chain:</b> A: <b>PDB Molecule:</b> epoxide hydrolase 2;<br><b>PDBTitle:</b> crystal structure of soluble epoxide hydrolase                                                                                                           |
| 70 | <a href="#">c2cbgA_</a>  | Alignment | not modelled | 91.4 | 14 | <b>PDB header:</b> hydrolase<br><b>Chain:</b> A: <b>PDB Molecule:</b> fengycin synthetase;<br><b>PDBTitle:</b> crystal structure of the pmsf-inhibited thioesterase domain2 of the fengycin biosynthesis cluster                                                        |
| 71 | <a href="#">d1g66a_</a>  | Alignment | not modelled | 91.2 | 15 | <b>Fold:</b> alpha/beta-Hydrolases<br><b>Superfamily:</b> alpha/beta-Hydrolases<br><b>Family:</b> Cutinase-like                                                                                                                                                         |
| 72 | <a href="#">c4eziA_</a>  | Alignment | not modelled | 91.2 | 24 | <b>PDB header:</b> unknown function<br><b>Chain:</b> A: <b>PDB Molecule:</b> uncharacterized protein;<br><b>PDBTitle:</b> crystal structure of a putative hydrolase (lpg1103) from legionella2 pneumophila subsp. pneumophila str. philadelphia 1 at 1.15 a3 resolution |
| 73 | <a href="#">c3k2iA_</a>  | Alignment | not modelled | 91.1 | 19 | <b>PDB header:</b> hydrolase<br><b>Chain:</b> A: <b>PDB Molecule:</b> acyl-coenzyme a thioesterase 4;<br><b>PDBTitle:</b> human acyl-coenzyme a thioesterase 4                                                                                                          |
| 74 | <a href="#">d1gpla2_</a> | Alignment | not modelled | 91.0 | 22 | <b>Fold:</b> alpha/beta-Hydrolases<br><b>Superfamily:</b> alpha/beta-Hydrolases<br><b>Family:</b> Pancreatic lipase, N-terminal domain                                                                                                                                  |
| 75 | <a href="#">c3ajaA_</a>  | Alignment | not modelled | 90.9 | 14 | <b>PDB header:</b> hydrolase<br><b>Chain:</b> A: <b>PDB Molecule:</b> putative uncharacterized protein;<br><b>PDBTitle:</b> crystal structure of msmeg_6394                                                                                                             |
| 76 | <a href="#">c4ao6A_</a>  | Alignment | not modelled | 90.8 | 13 | <b>PDB header:</b> hydrolase<br><b>Chain:</b> A: <b>PDB Molecule:</b> esterase;<br><b>PDBTitle:</b> native structure of a novel cold-adapted esterase from an2 arctic intertidal metagenomic library                                                                    |
| 77 | <a href="#">c3fcxA_</a>  | Alignment | not modelled | 90.8 | 18 | <b>PDB header:</b> hydrolase<br><b>Chain:</b> A: <b>PDB Molecule:</b> s-formylglutathione hydrolase;<br><b>PDBTitle:</b> crystal structure of human esterase d                                                                                                          |
| 78 | <a href="#">c3wydA_</a>  | Alignment | not modelled | 90.8 | 35 | <b>PDB header:</b> hydrolase<br><b>Chain:</b> A: <b>PDB Molecule:</b> lc-est1c;<br><b>PDBTitle:</b> c-terminal esterase domain of lc-est1                                                                                                                               |
| 79 | <a href="#">c3og9A_</a>  | Alignment | not modelled | 90.8 | 12 | <b>PDB header:</b> hydrolase<br><b>Chain:</b> A: <b>PDB Molecule:</b> protein yahd a copper inducible hydrolase;<br><b>PDBTitle:</b> structure of yahd with malic acid                                                                                                  |
| 80 | <a href="#">c3g8yA_</a>  | Alignment | not modelled | 90.8 | 17 | <b>PDB header:</b> hydrolase<br><b>Chain:</b> A: <b>PDB Molecule:</b> susd/ragb-associated esterase-like protein;<br><b>PDBTitle:</b> crystal structure of a putative hydrolase (bvU_4111) from bacteroides2 vulgatus atcc 8482 at 1.90 a resolution                    |



|     |                         |           |              |      |    |                                                                                                                                                                                                                                                                                |
|-----|-------------------------|-----------|--------------|------|----|--------------------------------------------------------------------------------------------------------------------------------------------------------------------------------------------------------------------------------------------------------------------------------|
| 81  | <a href="#">c4g4gA</a>  | Alignment | not modelled | 90.7 | 27 | <b>PDB header:</b> hydrolase<br><b>Chain:</b> A: <b>PDB Molecule:</b> 4-o-methyl-glucuronoyl methylesterase;<br><b>PDBTitle:</b> crystal structure of recombinant glucuronoyl esterase from2 sporotrichum thermophile determined at 1.55 a resolution                          |
| 82  | <a href="#">c3h04A</a>  | Alignment | not modelled | 90.6 | 16 | <b>PDB header:</b> structural genomics, unknown function<br><b>Chain:</b> A: <b>PDB Molecule:</b> uncharacterized protein;<br><b>PDBTitle:</b> the crystal structure of the protein with unknown function from2 staphylococcus aureus subsp. aureus mu50                       |
| 83  | <a href="#">c3fnbB</a>  | Alignment | not modelled | 90.5 | 22 | <b>PDB header:</b> hydrolase<br><b>Chain:</b> B: <b>PDB Molecule:</b> acylaminoacyl peptidase smu_737;<br><b>PDBTitle:</b> crystal structure of acylaminoacyl peptidase smu_737 from2 streptococcus mutans ua159                                                               |
| 84  | <a href="#">d1dqza</a>  | Alignment | not modelled | 90.4 | 17 | <b>Fold:</b> alpha/beta-Hydrolases<br><b>Superfamily:</b> alpha/beta-Hydrolases<br><b>Family:</b> Mycobacterial antigens                                                                                                                                                       |
| 85  | <a href="#">c3qmwD</a>  | Alignment | not modelled | 90.3 | 28 | <b>PDB header:</b> hydrolase<br><b>Chain:</b> D: <b>PDB Molecule:</b> thioesterase;<br><b>PDBTitle:</b> redj with peg molecule bound in the active site                                                                                                                        |
| 86  | <a href="#">c3gbsA</a>  | Alignment | not modelled | 90.3 | 16 | <b>PDB header:</b> hydrolase<br><b>Chain:</b> A: <b>PDB Molecule:</b> cutinase 1;<br><b>PDBTitle:</b> crystal structure of aspergillus oryzae cutinase                                                                                                                         |
| 87  | <a href="#">c2qs9A</a>  | Alignment | not modelled | 90.1 | 19 | <b>PDB header:</b> structural protein<br><b>Chain:</b> A: <b>PDB Molecule:</b> retinoblastoma-binding protein 9;<br><b>PDBTitle:</b> crystal structure of the human retinoblastoma-binding2 protein 9 (rbbp-9). nesg target hr2978                                             |
| 88  | <a href="#">d1qoza</a>  | Alignment | not modelled | 90.1 | 17 | <b>Fold:</b> alpha/beta-Hydrolases<br><b>Superfamily:</b> alpha/beta-Hydrolases<br><b>Family:</b> Cutinase-like                                                                                                                                                                |
| 89  | <a href="#">c2q0xA</a>  | Alignment | not modelled | 90.0 | 11 | <b>PDB header:</b> structural genomics, unknown function<br><b>Chain:</b> A: <b>PDB Molecule:</b> uncharacterized protein;<br><b>PDBTitle:</b> alpha/beta hydrolase fold protein of unknown function                                                                           |
| 90  | <a href="#">c3flaB</a>  | Alignment | not modelled | 90.0 | 17 | <b>PDB header:</b> hydrolase<br><b>Chain:</b> B: <b>PDB Molecule:</b> rifr;<br><b>PDBTitle:</b> rifr - type ii thioesterase from rifamycin nrps/pks biosynthetic2 pathway - form 1                                                                                             |
| 91  | <a href="#">c2r8bA</a>  | Alignment | not modelled | 90.0 | 11 | <b>PDB header:</b> structural genomics, unknown function<br><b>Chain:</b> A: <b>PDB Molecule:</b> uncharacterized protein atu2452;<br><b>PDBTitle:</b> the crystal structure of the protein atu2452 of unknown function from2 agrobacterium tumefaciens str. c58               |
| 92  | <a href="#">c2czqB</a>  | Alignment | not modelled | 89.9 | 16 | <b>PDB header:</b> hydrolase<br><b>Chain:</b> B: <b>PDB Molecule:</b> cutinase-like protein;<br><b>PDBTitle:</b> a novel cutinase-like protein from cryptococcus sp.                                                                                                           |
| 93  | <a href="#">c2qjwA</a>  | Alignment | not modelled | 89.7 | 18 | <b>PDB header:</b> hydrolase<br><b>Chain:</b> A: <b>PDB Molecule:</b> uncharacterized protein xcc1541;<br><b>PDBTitle:</b> crystal structure of a putative hydrolase of the alpha/beta2 superfamily (xcc1541) from xanthomonas campestris pv. campestris at3 1.35 a resolution |
| 94  | <a href="#">c3dd5F</a>  | Alignment | not modelled | 89.6 | 19 | <b>PDB header:</b> hydrolase<br><b>Chain:</b> F: <b>PDB Molecule:</b> cutinase;<br><b>PDBTitle:</b> glomerella cingulata e600-cutinase complex                                                                                                                                 |
| 95  | <a href="#">c4xjvA</a>  | Alignment | not modelled | 89.2 | 19 | <b>PDB header:</b> hydrolase<br><b>Chain:</b> A: <b>PDB Molecule:</b> s-acyl fatty acid synthase thioesterase, medium chain;<br><b>PDBTitle:</b> crystal structure of human thioesterase 2                                                                                     |
| 96  | <a href="#">d1etha2</a> | Alignment | not modelled | 89.2 | 18 | <b>Fold:</b> alpha/beta-Hydrolases<br><b>Superfamily:</b> alpha/beta-Hydrolases<br><b>Family:</b> Pancreatic lipase, N-terminal domain                                                                                                                                         |
| 97  | <a href="#">c3hikB</a>  | Alignment | not modelled | 89.1 | 24 | <b>PDB header:</b> hydrolase<br><b>Chain:</b> B: <b>PDB Molecule:</b> acyl-coenzyme a thioesterase 2, mitochondrial;<br><b>PDBTitle:</b> crystal structure of human mitochondrial acyl-coa2 thioesterase (acot2)                                                               |
| 98  | <a href="#">c3d59B</a>  | Alignment | not modelled | 88.8 | 35 | <b>PDB header:</b> hydrolase<br><b>Chain:</b> B: <b>PDB Molecule:</b> platelet-activating factor acetylhydrolase;<br><b>PDBTitle:</b> crystal structure of human plasma platelet activating2 factor acetylhydrolase                                                            |
| 99  | <a href="#">d1rp1a2</a> | Alignment | not modelled | 88.8 | 16 | <b>Fold:</b> alpha/beta-Hydrolases<br><b>Superfamily:</b> alpha/beta-Hydrolases<br><b>Family:</b> Pancreatic lipase, N-terminal domain                                                                                                                                         |
| 100 | <a href="#">c1cr6A</a>  | Alignment | not modelled | 88.6 | 10 | <b>PDB header:</b> hydrolase<br><b>Chain:</b> A: <b>PDB Molecule:</b> epoxide hydrolase;<br><b>PDBTitle:</b> crystal structure of murine soluble epoxide hydrolase2 complexed with cpu inhibitor                                                                               |
| 101 | <a href="#">d2r8ba1</a> | Alignment | not modelled | 88.6 | 11 | <b>Fold:</b> alpha/beta-Hydrolases<br><b>Superfamily:</b> alpha/beta-Hydrolases<br><b>Family:</b> Carboxylesterase/thioesterase 1                                                                                                                                              |
| 102 | <a href="#">c4eb0A</a>  | Alignment | not modelled | 88.5 | 50 | <b>PDB header:</b> hydrolase<br><b>Chain:</b> A: <b>PDB Molecule:</b> lcc;<br><b>PDBTitle:</b> crystal structure of leaf-branch compost bacterial cutinase homolog                                                                                                             |
| 103 | <a href="#">c4wfiA</a>  | Alignment | not modelled | 88.5 | 40 | <b>PDB header:</b> hydrolase<br><b>Chain:</b> A: <b>PDB Molecule:</b> cutinase;<br><b>PDBTitle:</b> crystal structure of pet-degrading cutinase cut190 s226p mutant in2 ca(2+)-free state                                                                                      |
| 104 | <a href="#">c5d6oB</a>  | Alignment | not modelled | 88.3 | 21 | <b>PDB header:</b> transferase<br><b>Chain:</b> B: <b>PDB Molecule:</b> homoserine o-acetyltransferase;<br><b>PDBTitle:</b> orthorhombic crystal structure of an acetyler hydrolase from2 corynebacterium glutamicum                                                           |
| 105 | <a href="#">d1jmkc</a>  | Alignment | not modelled | 88.2 | 16 | <b>Fold:</b> alpha/beta-Hydrolases<br><b>Superfamily:</b> alpha/beta-Hydrolases<br><b>Family:</b> Thioesterase domain of polypeptide, polyketide and fatty acid synthases                                                                                                      |
| 106 | <a href="#">c5cxcC</a>  | Alignment | not modelled | 88.0 | 13 | <b>PDB header:</b> hydrolase<br><b>Chain:</b> C: <b>PDB Molecule:</b> ferulic acid esterase, amce1/fae1a;<br><b>PDBTitle:</b> structure of a ce1 ferulic acid esterase, amce1/fae1a, from2 anaeromyces mucronatus in complex with ferulic acid                                 |

|     |                         |           |              |      |    |                                                                                                                                                                                                                                 |
|-----|-------------------------|-----------|--------------|------|----|---------------------------------------------------------------------------------------------------------------------------------------------------------------------------------------------------------------------------------|
| 107 | <a href="#">c3visB_</a> | Alignment | not modelled | 87.9 | 50 | <b>PDB header:</b> hydrolase<br><b>Chain:</b> B: <b>PDB Molecule:</b> esterase;<br><b>PDBTitle:</b> crystal structure of cutinase est119 from thermobifida alba ahk119                                                          |
| 108 | <a href="#">c4oylC_</a> | Alignment | not modelled | 87.9 | 18 | <b>PDB header:</b> hydrolase<br><b>Chain:</b> C: <b>PDB Molecule:</b> cutinase;<br><b>PDBTitle:</b> humicola insolens cutinase in complex with mono-ethylphosphate                                                              |
| 109 | <a href="#">d1jfra_</a> | Alignment | not modelled | 87.6 | 45 | <b>Fold:</b> alpha/beta-Hydrolases<br><b>Superfamily:</b> alpha/beta-Hydrolases<br><b>Family:</b> Lipase                                                                                                                        |
| 110 | <a href="#">d1hpla2</a> | Alignment | not modelled | 87.2 | 16 | <b>Fold:</b> alpha/beta-Hydrolases<br><b>Superfamily:</b> alpha/beta-Hydrolases<br><b>Family:</b> Pancreatic lipase, N-terminal domain                                                                                          |
| 111 | <a href="#">c2uz0B_</a> | Alignment | not modelled | 87.1 | 13 | <b>PDB header:</b> hydrolase<br><b>Chain:</b> B: <b>PDB Molecule:</b> tributyryn esterase;<br><b>PDBTitle:</b> the crystal crystal structure of the esta protein, a2 virulence factor esta protein from streptococcus pneumonia |
| 112 | <a href="#">d1pv1a_</a> | Alignment | not modelled | 87.0 | 18 | <b>Fold:</b> alpha/beta-Hydrolases<br><b>Superfamily:</b> alpha/beta-Hydrolases<br><b>Family:</b> Hypothetical esterase YJL068C                                                                                                 |
| 113 | <a href="#">c4qloA_</a> | Alignment | not modelled | 87.0 | 24 | <b>PDB header:</b> transferase<br><b>Chain:</b> A: <b>PDB Molecule:</b> homoserine o-acetyltransferase;<br><b>PDBTitle:</b> crystal structure of homoserine o-acetyltransferase from2 staphylococcus aureus                     |
| 114 | <a href="#">c3i6yA_</a> | Alignment | not modelled | 86.9 | 21 | <b>PDB header:</b> hydrolase<br><b>Chain:</b> A: <b>PDB Molecule:</b> esterase apc40077;<br><b>PDBTitle:</b> structure of an esterase from the oil-degrading bacterium oleispira2 antarctica                                    |
| 115 | <a href="#">c2hu7A_</a> | Alignment | not modelled | 86.9 | 18 | <b>PDB header:</b> hydrolase<br><b>Chain:</b> A: <b>PDB Molecule:</b> acylamino-acid-releasing enzyme;<br><b>PDBTitle:</b> binding of inhibitors by acylaminoacyl peptidase                                                     |
| 116 | <a href="#">c3jyhD_</a> | Alignment | not modelled | 86.8 | 29 | <b>PDB header:</b> hydrolase<br><b>Chain:</b> D: <b>PDB Molecule:</b> dipeptidyl-peptidase 2;<br><b>PDBTitle:</b> human dipeptidyl peptidase dpp7                                                                               |
| 117 | <a href="#">c3doiA_</a> | Alignment | not modelled | 86.8 | 25 | <b>PDB header:</b> hydrolase<br><b>Chain:</b> A: <b>PDB Molecule:</b> esterase;<br><b>PDBTitle:</b> crystal structure of a thermostable esterase complex with2 paraoxon                                                         |
| 118 | <a href="#">c3e4dD_</a> | Alignment | not modelled | 86.7 | 22 | <b>PDB header:</b> hydrolase<br><b>Chain:</b> D: <b>PDB Molecule:</b> esterase d;<br><b>PDBTitle:</b> structural and kinetic study of an s-formylglutathione2 hydrolase from agrobacterium tumefaciens                          |
| 119 | <a href="#">c4fhzA_</a> | Alignment | not modelled | 86.5 | 12 | <b>PDB header:</b> hydrolase<br><b>Chain:</b> A: <b>PDB Molecule:</b> phospholipase/carboxylesterase;<br><b>PDBTitle:</b> crystal structure of a carboxyl esterase at 2.0 angstrom resolution                                   |
| 120 | <a href="#">c4b6gA_</a> | Alignment | not modelled | 86.5 | 19 | <b>PDB header:</b> hydrolase<br><b>Chain:</b> A: <b>PDB Molecule:</b> putative esterase;<br><b>PDBTitle:</b> the crystal structure of the neisserial esterase d.                                                                |



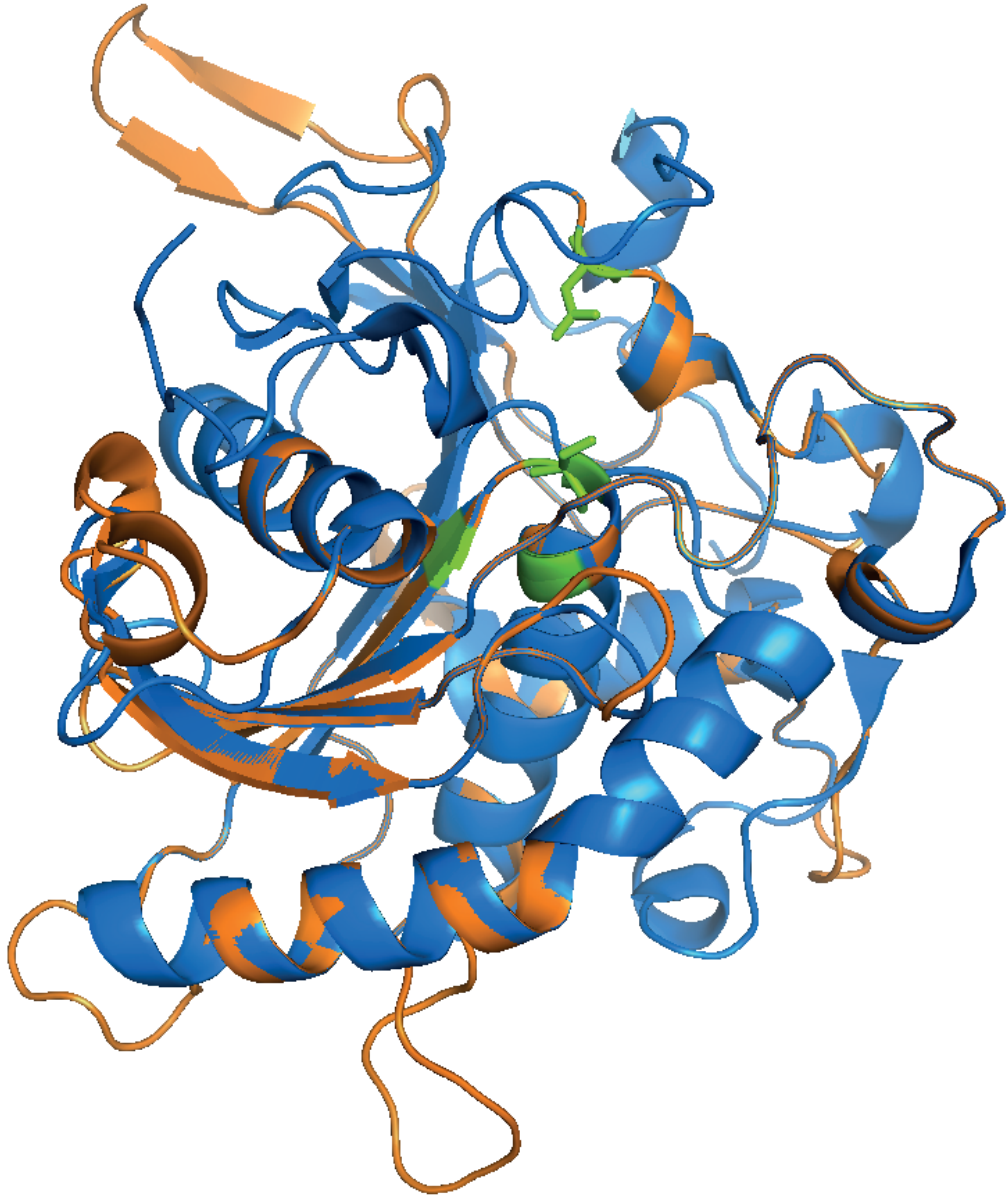

Supplement: MOESM5 [file 12870_2017_1042_MOESM5_ESM.pdf]
