# Supplementary material for: Analysis of the lipid body proteome of the oleaginous alga Lobosphaera incisa
Source: Springer Nature journal article supplement (doi:10.1186/s12870-017-1042-2), 2017-06-06

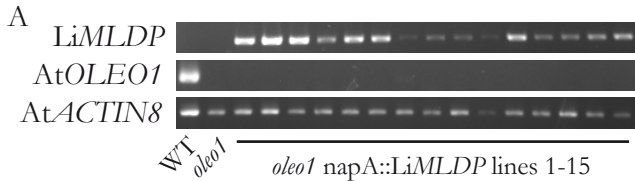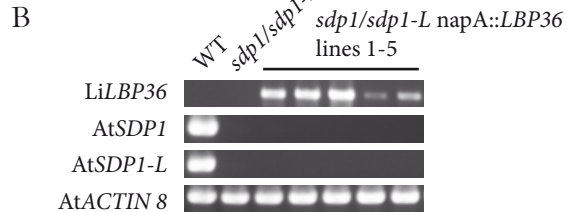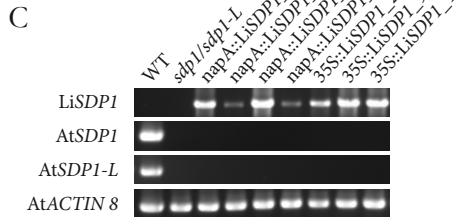

Supplement: MOESM4 [file 12870_2017_1042_MOESM4_ESM.pdf]
